# Supplementary material for: ICT-driven Ag + detection using xylene-spacer integrated naphthalene probes as fluorescent chemosensors: selectivity, practical monitoring, and anticounterfeiting
Source: Royal Society of Chemistry journal article supplement (doi:10.1039/d5sd00202h), 2026-01-01
Supplement: d5sd00202h1.pdf [file d5sd00202h1.pdf]

## ICT-Driven Ag<sup>+</sup> Detection Using Xylene-spacer integrated Naphthalene Probes as Fluorescent Chemosensors: Selectivity, Practical Monitoring, and Anticounterfeiting

Narmatha Ganesan<sup>a</sup>, Kavanya Srinivasan<sup>a</sup>, Elizabeth Antony<sup>a</sup>, hab. Jan G. Malecki<sup>b</sup>, Abisha Nancy Sukumar<sup>c</sup>, Abiram Angamuthu<sup>d,\*</sup>, J. Prabhu<sup>a</sup>, Raju Nandhakumar<sup>a,\*</sup>

<sup>a</sup>*Fluorensic Materials Lab, Division of Physical Science, Karunya Institute of Technology and Sciences, (Deemed-to-be University), Karunya Nagar, Coimbatore - 641 114, India.*

*\*E-mail: [nandhakumar@karunya.edu](mailto:nandhakumar@karunya.edu)*

<sup>b</sup>*Institute of Chemistry, University of Silesia, Szkolna 9 str. 40-006 Katowice.*

<sup>c</sup>*Department of physics, Karpagam College of Engineering, Coimbatore, Tamil Nadu, India*

<sup>d</sup>*Department of physics, Rathinam Technical Campus, Coimbatore- 641021, Tamil Nadu, India*

*\*E-mail: [aabiram@gmail.com](mailto:aabiram@gmail.com)*

## 2. Experimental section

### Materials and Instrumentation

2-hydroxy acetonephthone, dibromo xylene and naphthaldehyde were purchased from sigma-Aldrich. All the chemicals and reagents were purchased from commercially available sources like Himedia, Loba Chem. Ltd and Sigma Aldrich. <sup>1</sup>H NMR and <sup>13</sup>C NMR Spectra were recorded on a Bruker 300 MHz high-resolution NMR Spectrometer respectively, using CDCl<sub>3</sub> solution with TMS as an internal standard. Coupling constants (J) are measured in Hertz. LC-MS were determined on a Shimadzu Lab Solutions Data Report. UV absorption spectra were recorded at ambient temperature using a Shimadzu UV-Vis spectrophotometer using quartz cuvettes. Fluorescence emission spectra were recorded on a Jasco FP-8200 Spectrofluorometer with quartz cuvettes 4.5 cm height of 1 cm path length. The excitation and emission slit widths recorded were 5.0 nm, all absorption and emission spectra at 24±1°C. The stock solution of the probe **ONA** and **MNA** (2× 10<sup>-3</sup> M) and metal salts (4× 10<sup>-6</sup> M) were prepared in MeOH : H<sub>2</sub>O (1:1, v/v), HEPES= 50 mM, pH =7.3). The solution of metal ions was prepared from nitrate and chloride salts of K<sup>+</sup>, Ca<sup>2+</sup>, Na<sup>+</sup>, Mg<sup>2+</sup>, Cr<sup>3+</sup>, Mn<sup>2+</sup>, Co<sup>2+</sup>, Ni<sup>2+</sup>, Cu<sup>2+</sup>, Hg<sup>2+</sup>, Cd<sup>2+</sup>, Fe<sup>3+</sup>, Zn<sup>2+</sup>, Al<sup>3+</sup>, Li<sup>+</sup>, Bi<sup>3+</sup>, Sr<sup>2+</sup>, Ag<sup>+</sup>, Ba<sup>2+</sup>, Zr<sup>2+</sup>, Pb<sup>2+</sup> and Fe<sup>2+</sup>.

### Procedure for the extraction of Ag<sup>+</sup>

The real samples of barely, millet, sorghum, oats, black rice, radish, turnip, sweet potato, tapioca were soaked overnight in concentrated nitric acid. On the very next day

it was centrifuged to remove the residues. The supernatants layers were used for the detection of  $\text{Ag}^+$ .

| Entry | Title                                                                                                                                                 | Page No |
|-------|-------------------------------------------------------------------------------------------------------------------------------------------------------|---------|
| 1     | <b>Figure S1.</b> $^1\text{H}$ NMR Spectrum of sensor <b>ONA</b>                                                                                      | S3      |
| 2     | <b>Figure S2.</b> $^1\text{H}$ NMR Spectrum of sensor <b>MNA</b>                                                                                      | S3      |
| 3     | <b>Figure S3.</b> $^{13}\text{C}$ NMR Spectrum of sensor <b>ONA</b>                                                                                   | S4      |
| 4     | <b>Figure S4.</b> $^{13}\text{C}$ NMR Spectrum of sensor <b>MNA</b>                                                                                   | S4      |
| 5     | <b>Figure S5.</b> Mass Spectrum of sensor <b>ONA</b>                                                                                                  | S5      |
| 6     | <b>Figure S6.</b> Mass Spectrum of sensor <b>MNA</b>                                                                                                  | S5      |
| 7     | <b>Figure S7.</b> UV-Visible Spectrum of sensor a) <b>ONA</b> and b) <b>MNA</b>                                                                       | S5      |
| 8     | <b>Figure S8.</b> Interfering studies of <b>ONA</b> and <b>MNA</b> and its complex with $\text{Ag}^+$                                                 | S6      |
| 9     | <b>Figure S9.</b> Job's plot of <b>ONA</b> and <b>MNA</b>                                                                                             | S6      |
| 10    | <b>Figure S10.</b> Benesi hieldbrand of <b>ONA</b> and <b>MNA</b>                                                                                     | S6      |
| 9     | <b>Figure S11.</b> Time effect of <b>ONA</b> and <b>MNA</b> with $\text{Ag}^+$ ion                                                                    | S7      |
| 10    | <b>Figure S12.</b> Reversibility and EDTA of <b>ONA</b> and <b>MNA</b> with $\text{Ag}^+$ ion                                                         | S7      |
| 11    | <b>Figure S13.</b> pH effect of <b>ONA</b> and <b>MNA</b> with $\text{Ag}^+$                                                                          | S8      |
| 12    | <b>Figure S14.</b> Fluorescence lifetime decay of <b>ONA</b> and <b>MNA</b> and its complexation with $\text{Ag}^+$                                   | S8      |
| 13    | <b>Figure S15.</b> $^{13}\text{C}$ NMR of <b>ONA</b> and <b>ONA</b> +2 $\text{Ag}^+$                                                                  | S9      |
| 14    | <b>Figure S16.</b> $^{13}\text{C}$ NMR of <b>MNA</b> and <b>MNA</b> +2 $\text{Ag}^+$                                                                  | S9      |
| 15    | <b>Table S1.</b> Calculated bond lengths, bond angles and dihedral angles of <b>ONA</b> , <b>MNA</b> and its complexes with $\text{Ag}^+$             | S11     |
| 16    | <b>Figure S17.</b> Optimized geometries of (a) <b>ONA</b> , (b) <b>MNA</b> , (c) <b>ONA</b> - $\text{Ag}^+$ and (d) <b>MNA</b> - $\text{Ag}^+$        | S12     |
| 17    | <b>Figure S18.</b> Frontier molecular orbitals of (a) <b>ONA</b> , (b) <b>ONA</b> - $\text{Ag}^+$ , (c) <b>MNA</b> and (d) <b>MNA</b> - $\text{Ag}^+$ | S12     |
| 18    | <b>Figure S19.</b> Single crystal XRD of <b>ONA</b>                                                                                                   | S13     |

|    |                                                                           |     |
|----|---------------------------------------------------------------------------|-----|
| 19 | <b>Table S2.</b> Crystal data and structure refinement for <b>ONA</b>     | S13 |
| 20 | <b>Figure S20.</b> Cytotoxicity of probes <b>ONA</b> and <b>MNA</b> alone | S14 |
| 21 | <b>Table S3.</b> IC <sub>50</sub> values calculated from MCF-7 cell line  | S14 |

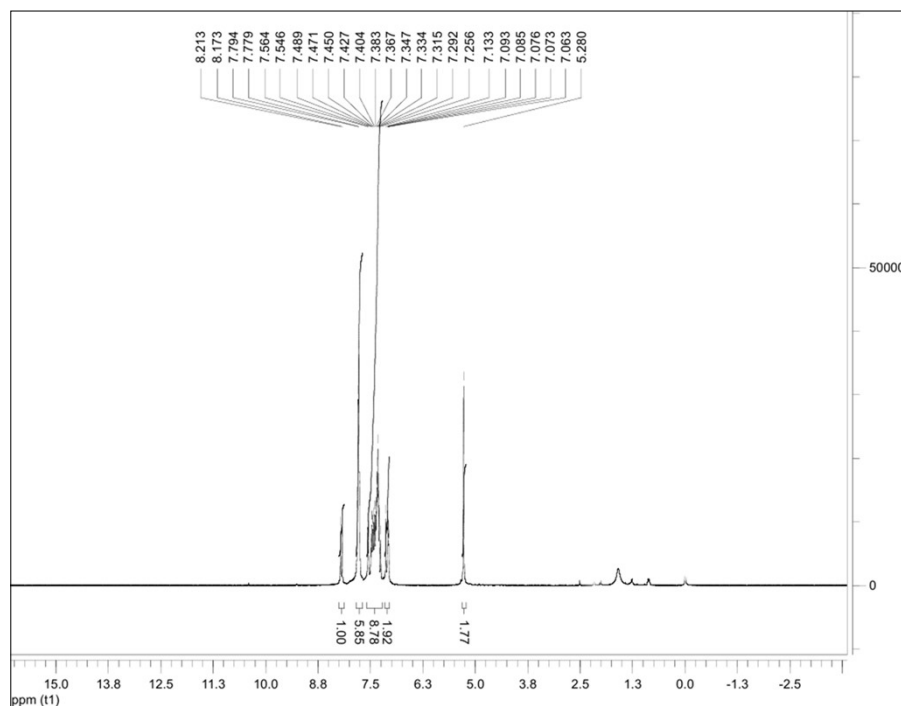

**Figure S1.** <sup>1</sup>H NMR Spectrum of sensor **ONA**

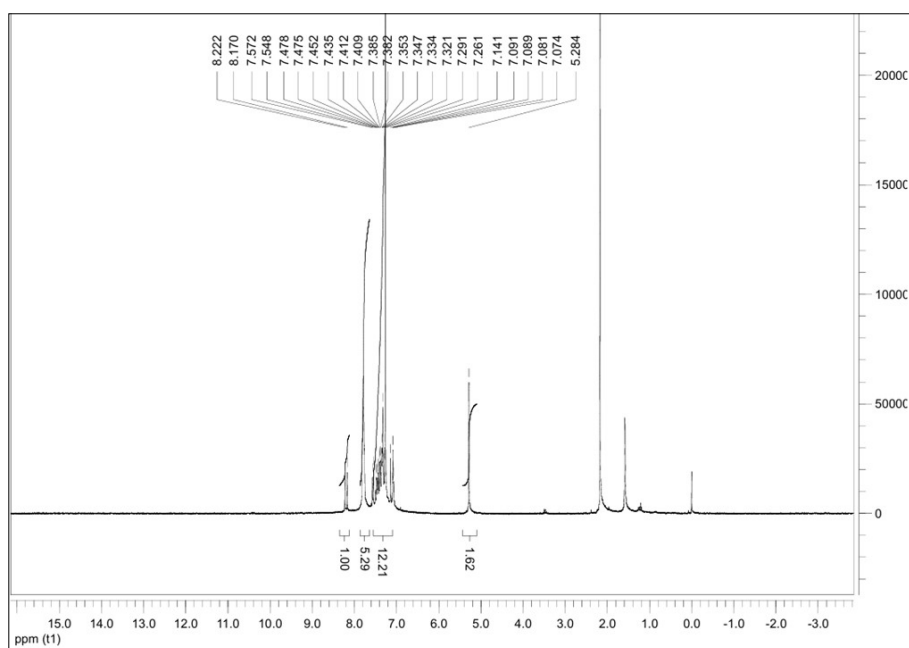

**Figure S2.** <sup>1</sup>H NMR Spectrum of sensor **MNA**

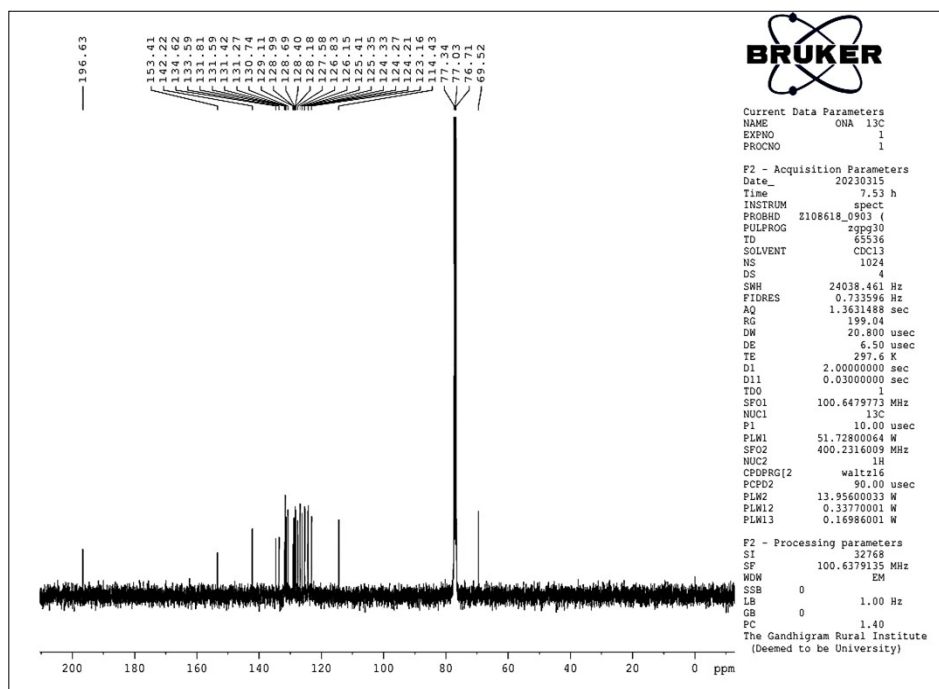

**Figure S3.**  $^{13}\text{C}$  NMR Spectrum of sensor ONA

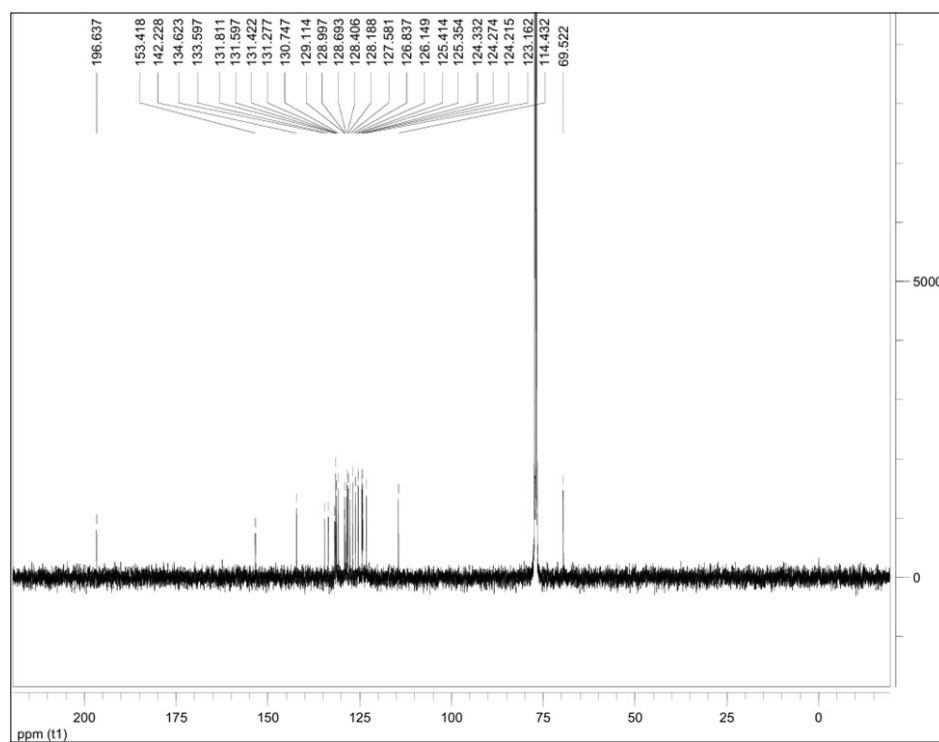

**Figure S4.**  $^{13}\text{C}$  NMR Spectrum of sensor MNA

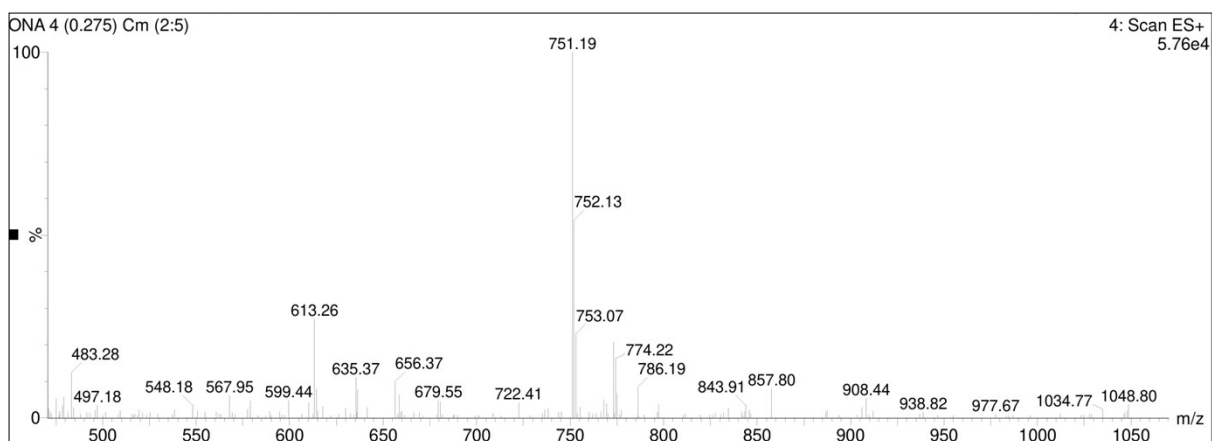

**Figure S5. Mass Spectrum of sensor ONA**

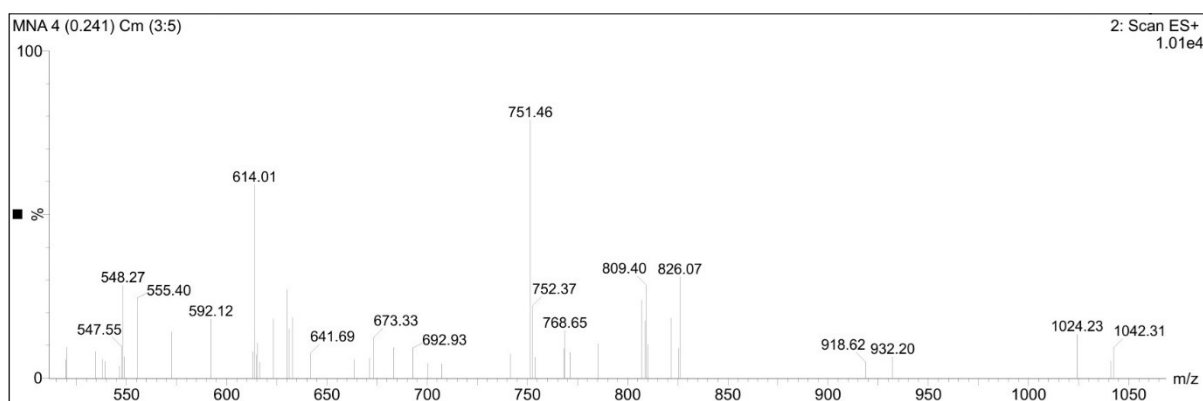

**Figure S6. Mass Spectrum of sensor MNA**

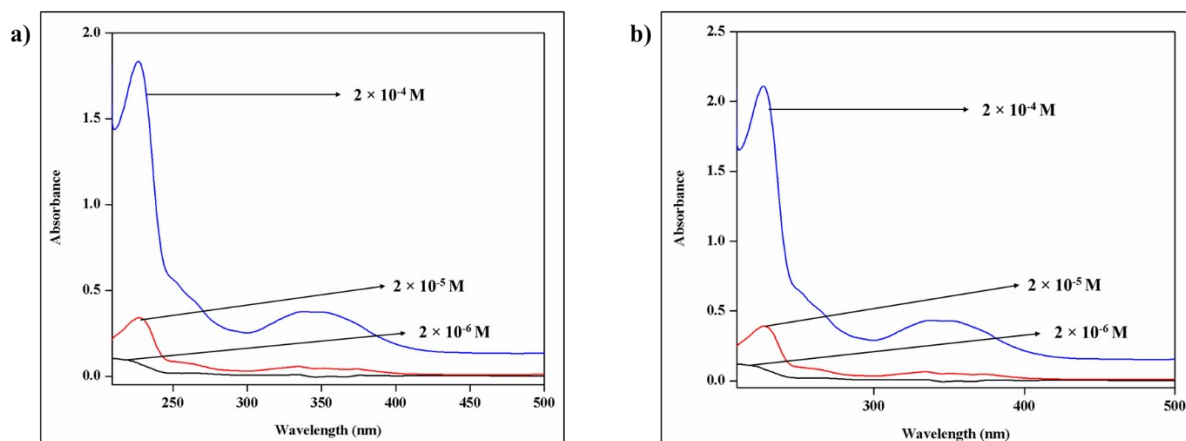

**Figure S7. UV-Visible Spectrum of sensor a) ONA and b) MNA in MeOH solvent**

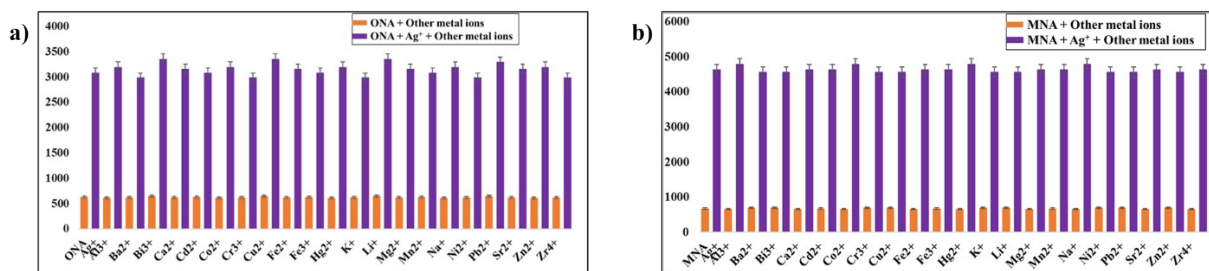

**Figure S8.** Interference spectra of **ONA** and **MNA** with  $\text{Ag}^+$  and other metal ions. Red bar indicates that **ONA**+ $\text{Ag}^+$  and **MNA**+ $\text{Ag}^+$  with other metal ions and the green bar indicates that **ONA** and **MNA** with other metal ions other than  $\text{Ag}^+$  ion. (Error bar,  $n=3$ )

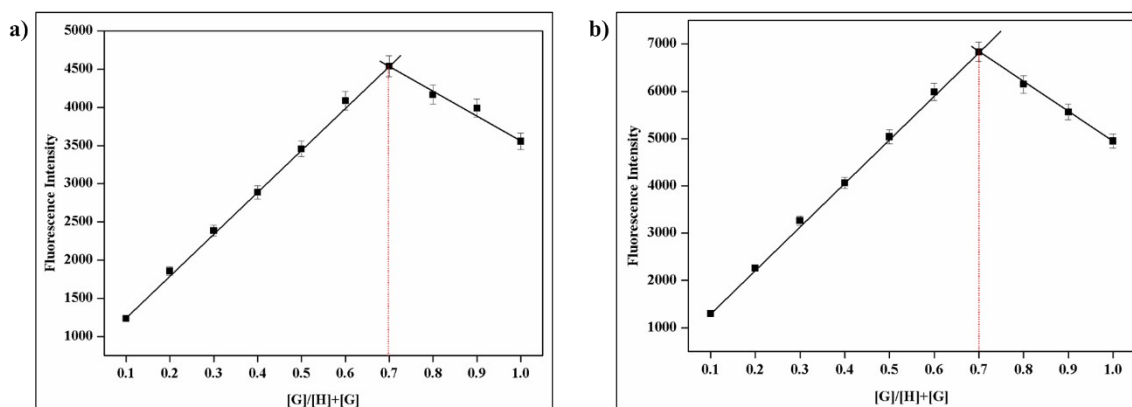

**Figure S9.** Job's plot of a) **ONA** and b) **MNA** with  $\text{Ag}^+$  ion ( $4 \times 10^{-6}$  M) in MeOH:H<sub>2</sub>O solution (1:1 v/v, HEPES=50 mM, pH=7.3)  $\lambda_{\text{ex}}=340\text{nm}$ . (Error bar,  $n=3$ )

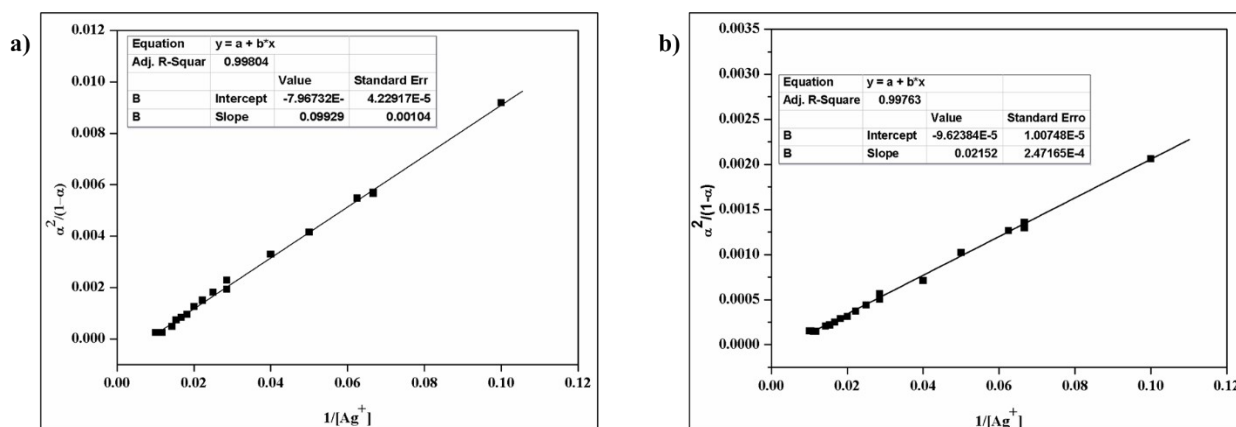

**Figure S10.** Benesi-Hilderband of a) **ONA** and b) **MNA** with  $\text{Ag}^+$  ion ( $4 \times 10^{-6}$  M) in MeOH:H<sub>2</sub>O solution.

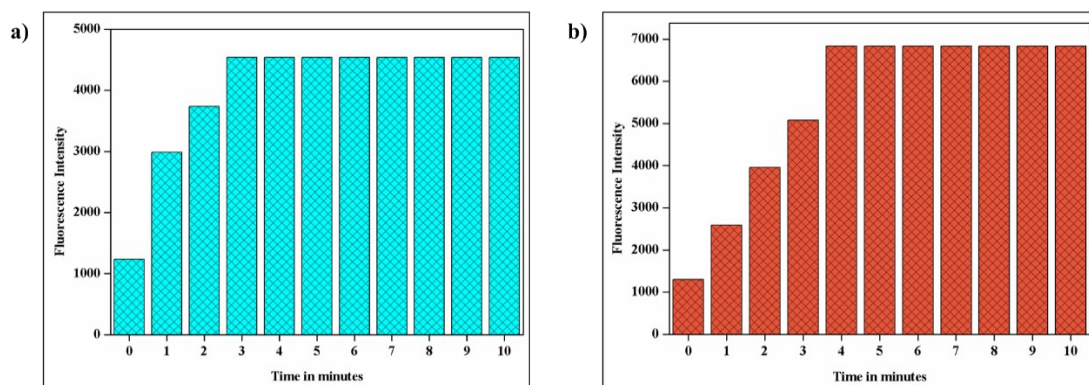

**Figure S11.** Time effect of a) **ONA** and b) **MNA** with  $\text{Ag}^+$  ion ( $4 \times 10^{-6} \text{ M}$ ) in MeOH:H<sub>2</sub>O solution (1:1 v/v, HEPES=50 mM, pH=7.3)  $\lambda_{\text{ex}}=340\text{nm}$ .

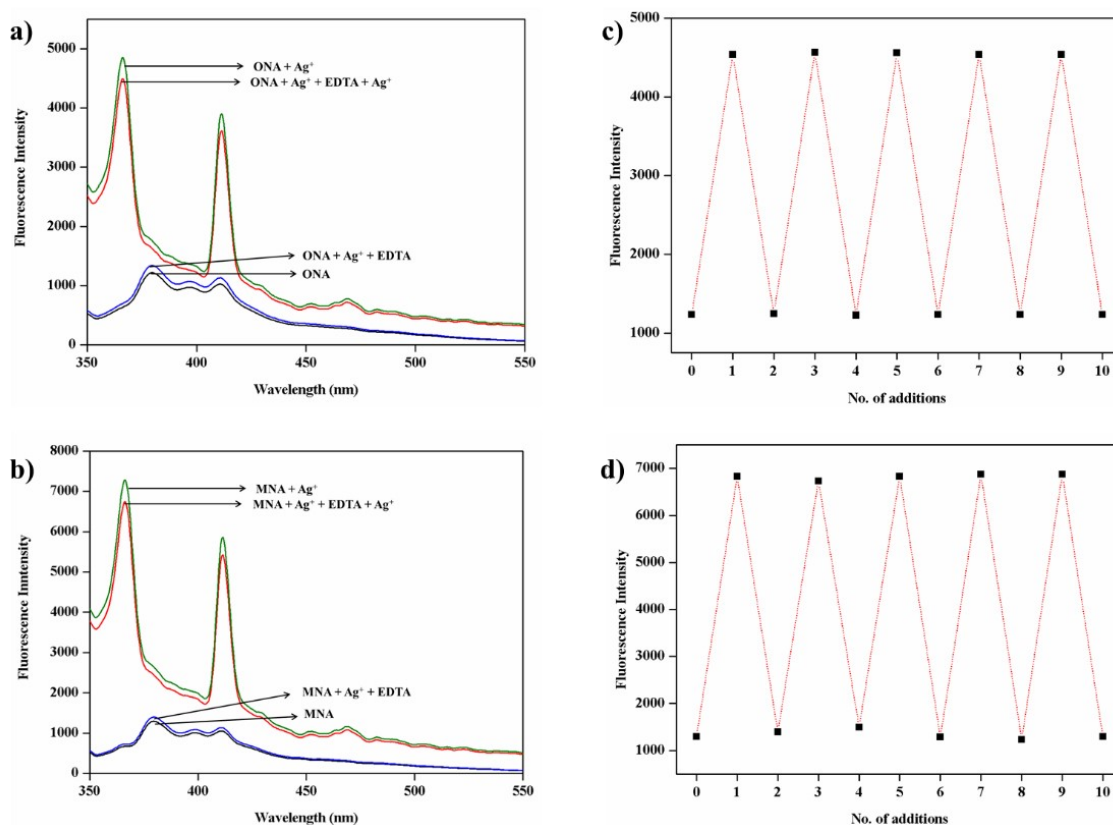

**Figure S12.** Reversibility experiment was carried out in MeOH:H<sub>2</sub>O (1:1) buffer solution in the presence and absence of  $\text{Ag}^+$  with probe a) **ONA** and b) **MNA**. Effective affective addition of c) **ONA** and b) **MNA** with  $\text{Ag}^+$  ion in the presence of EDTA in MeOH:H<sub>2</sub>O solution (1:1 v/v HEPES 50Mm, pH=7.3) ( $\lambda_{\text{ex}}=340\text{nm}$ )



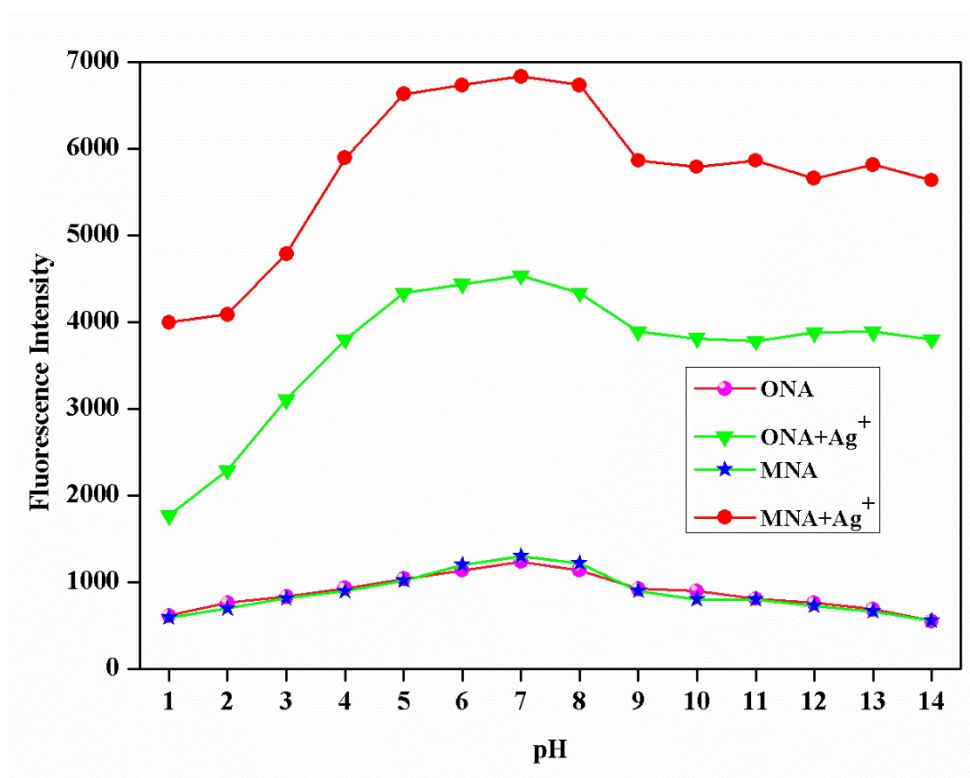

**Figure S13.** pH effect of **ONA** and **MNA** with  $\text{Ag}^+$  in MeOH:H<sub>2</sub>O solution (1:1 v/v) ( $\lambda_{\text{ex}}=340\text{nm}$ ).

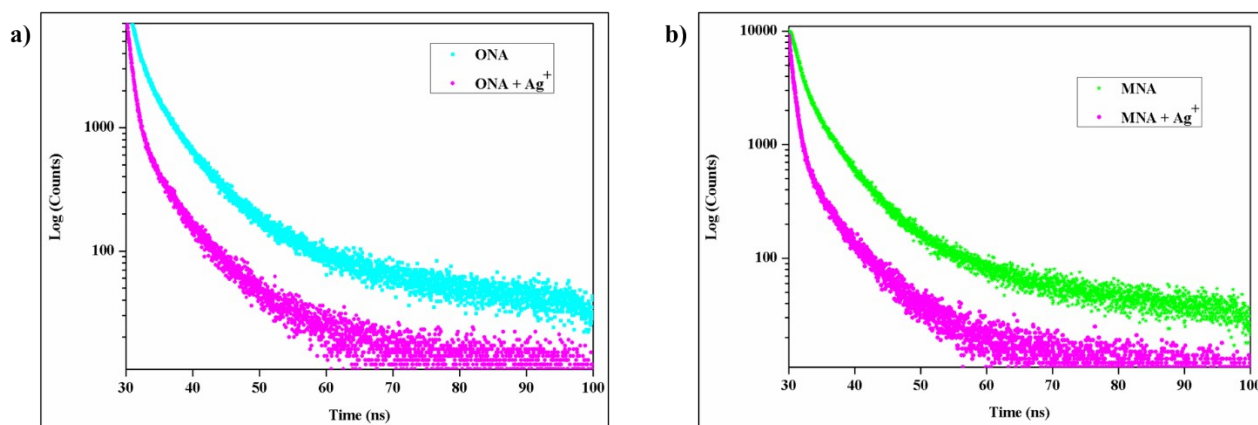

**Figure S14.** Fluorescence lifetime decay of **ONA** and **MNA** and its complexation with  $\text{Ag}^+$  in MeOH:H<sub>2</sub>O solution.



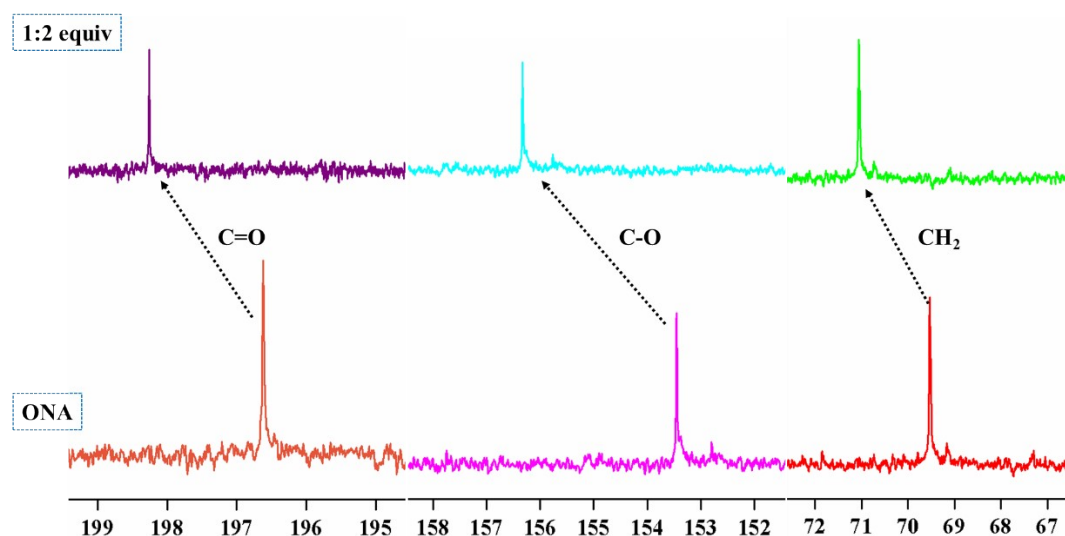

**Figure S15.**  $^{13}\text{C}$  NMR of ONA and  $\text{ONA}+2\text{Ag}^+$

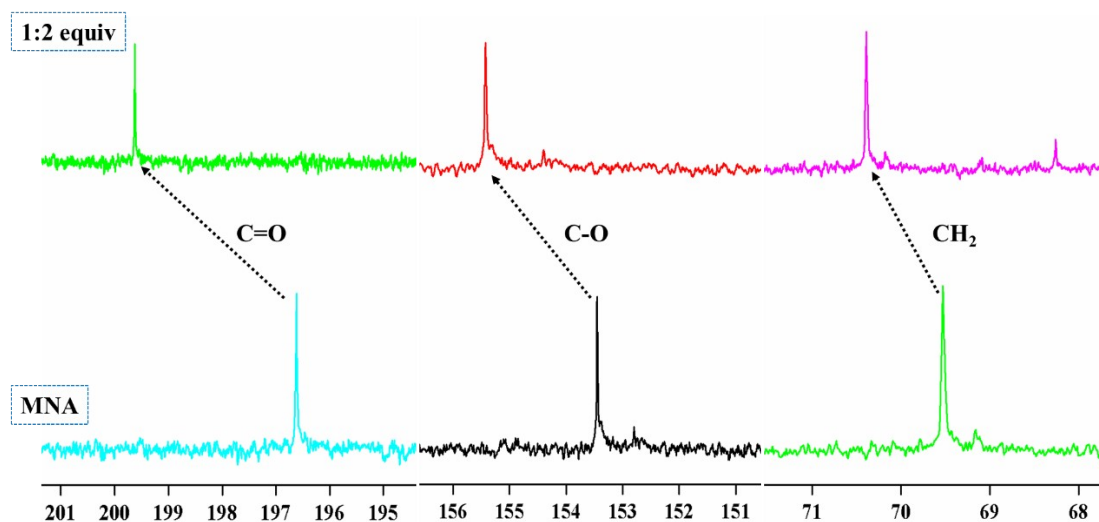

**Figure S16.**  $^{13}\text{C}$  NMR of MNA and  $\text{MNA}+2\text{Ag}^+$

**Table S1.** Calculated bond lengths, bond angles and dihedral angles of ONA, MNA and its complexes with  $\text{Ag}^+$

| Parameters                    | ONA ( $\text{\AA}$ ) | ONA- $\text{Ag}^+$ ( $\text{\AA}$ ) | MNA   | MNA- $\text{Ag}^+$ ( $\text{\AA}$ ) |
|-------------------------------|----------------------|-------------------------------------|-------|-------------------------------------|
| <b>Bond lengths</b>           |                      |                                     |       |                                     |
| $\text{C}_{18}=\text{C}_{19}$ | 1.322                | 1.323                               | 1.322 | 1.780                               |
| $\text{C}_{21}=\text{O}_{23}$ | 1.215                | 1.231                               | 1.218 | 1.337                               |
| $\text{C}_{37}-\text{O}_{79}$ | 1.375                | 1.422                               | 1.382 | 1.293                               |

|                                                                    |         |         |         |        |
|--------------------------------------------------------------------|---------|---------|---------|--------|
| C <sub>88</sub> -C <sub>81</sub>                                   | 1.514   | 1.514   | 1.550   | 1.000  |
| C <sub>81</sub> -H <sub>93</sub>                                   | 1.078   | 1.078   | 1.081   | 1.000  |
| C <sub>88</sub> -C <sub>87</sub>                                   | 1.383   | 1.432   | 1.380   | 1.469  |
| C <sub>87</sub> -C <sub>86</sub>                                   | -       | -       | 1.383   |        |
| C <sub>86</sub> -C <sub>82</sub>                                   |         |         | 1.510   |        |
| C <sub>82</sub> -C <sub>87</sub>                                   | 1.447   | 1.467   | -       | -      |
| C <sub>82</sub> -O <sub>80</sub>                                   | 1.456   | 1.471   | 1.466   | 1.362  |
| C <sub>60</sub> =O <sub>62</sub>                                   | 1.216   | 1.311   | 1.224   | 1.390  |
| C <sub>60</sub> -C <sub>58</sub>                                   | 1.479   | 1.491   | 1.477   |        |
| Ag <sup>+</sup> <sub>97</sub> ...O <sub>23</sub>                   | -       | 2.079   | -       | -      |
| Ag <sup>+</sup> <sub>97</sub> ...O <sub>79</sub>                   | -       | 1.920   | -       | -      |
| Ag <sup>+</sup> <sub>98</sub> ...O <sub>62</sub>                   | -       | 1.889   | -       | -      |
| Ag <sup>+</sup> <sub>98</sub> ...O <sub>80</sub>                   |         | 2.263   |         |        |
| Ag <sup>+</sup> <sub>97</sub> ...O <sub>62</sub>                   | -       | -       | -       | 2.352  |
| Ag <sup>+</sup> <sub>97</sub> ...O <sub>80</sub>                   | -       | -       | -       | 2.655  |
| Ag <sup>+</sup> <sub>98</sub> ...O <sub>79</sub>                   | -       | -       | -       | 2.558  |
| Ag <sup>+</sup> <sub>98</sub> ...O <sub>23</sub>                   | -       | -       | -       | 2.320  |
| <b>Bond angles</b>                                                 |         |         |         |        |
| C <sub>18</sub> =C <sub>19</sub> -H <sub>20</sub>                  | 121.72  | 121.50  | 121.44  | 121.87 |
| O <sub>23</sub> =C <sub>21</sub> -C <sub>19</sub>                  | 119.81  | 120.95  | 120.48  | 120    |
| O <sub>79</sub> -C <sub>81</sub> -C <sub>88</sub>                  | 111.10  | 111.66  | 111.39  | 112    |
| C <sub>88</sub> -C <sub>87</sub> -C <sub>86</sub>                  | -       | -       | 120.57  | 120.10 |
| C <sub>88</sub> -C <sub>87</sub> -C <sub>86</sub>                  | -       | -       | 110.08  | 110.93 |
| C <sub>88</sub> -C <sub>87</sub> -H <sub>95</sub>                  | 122     | 122.06  | -       | -      |
| C <sub>82</sub> -O <sub>80</sub> -C <sub>76</sub>                  | 119.99  | 120.38  | 120.60  | 119    |
| O <sub>62</sub> =C <sub>60</sub> -C <sub>58</sub>                  | 120.01  | 119.69  | 119.75  | 120.40 |
| <b>Dihedral angles</b>                                             |         |         |         |        |
| C <sub>18</sub> =C <sub>19</sub> -C <sub>21</sub> =O <sub>23</sub> | 178.03  | 178.45  | -179.59 | 179.99 |
| C <sub>37</sub> -O <sub>79</sub> -C <sub>81</sub> -H <sub>93</sub> | -142.24 | -129.78 | -179.98 | -179.9 |
| C <sub>77</sub> -C <sub>76</sub> -O <sub>80</sub> -C <sub>82</sub> | -71     | -61.30  | -       | -      |

|                               |        |        |         |         |
|-------------------------------|--------|--------|---------|---------|
| $O_{62}=C_{60}-C_{58}-H_{59}$ | 17.45  | 13.45  | 107.99  | 107.45  |
| $C_{27}-N_{39}-C_{28}-C_{29}$ | 126.16 | 145.57 | -179.04 | -179.99 |

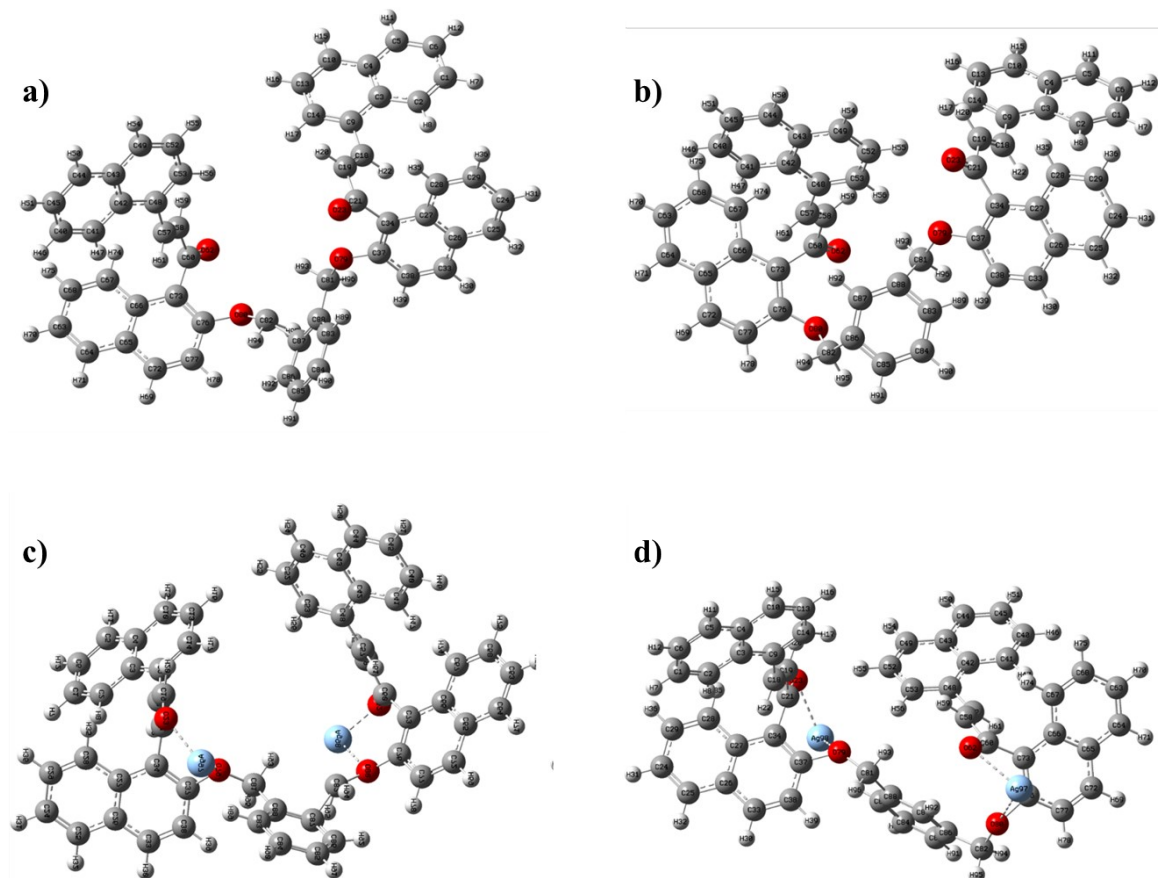

**Figure S17.** Optimized geometries of (a) **ONA**, (b) **MNA**, (c) **ONA-Ag<sup>+</sup>** and (d) **MNA-Ag<sup>+</sup>**

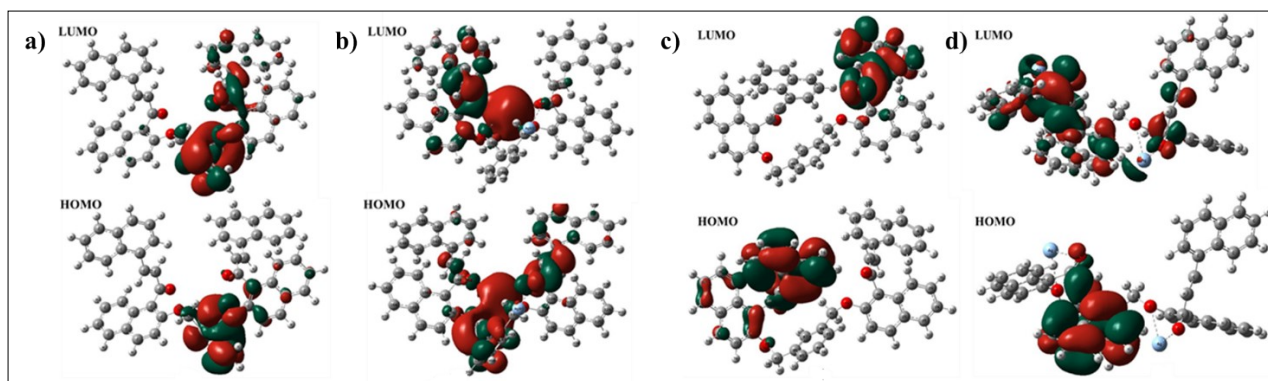

**Figure S18.** Frontier molecular orbitals of (a) ONA, (b) ONA-Ag<sup>+</sup>, (c) MNA and (d) MNA-Ag<sup>+</sup>

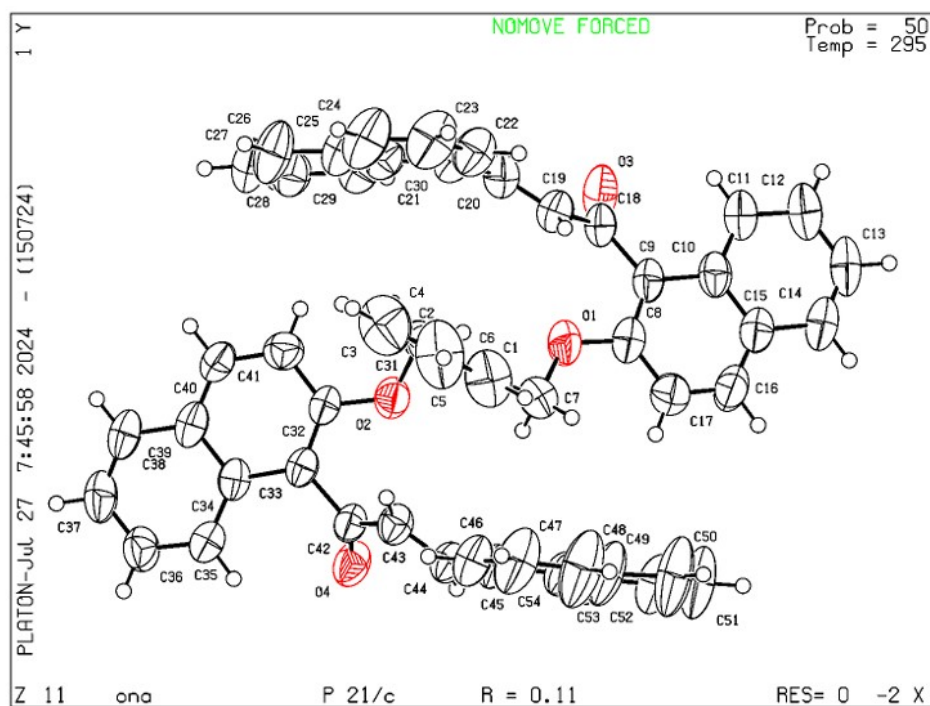

**Figure S19.** Single crystal XRD of ONA

**Table S2.** Crystal data and structure refinement for **ONA**

|                         |                                                                                                |
|-------------------------|------------------------------------------------------------------------------------------------|
| Identification code     | ONA                                                                                            |
| Empirical formula       | C <sub>54</sub> H <sub>38</sub> O <sub>4</sub>                                                 |
| Formula weight          | 750.89                                                                                         |
| Temperature             | 295 K                                                                                          |
| Wavelength              | 0.71073 Å                                                                                      |
| Crystal system          | Triclinic                                                                                      |
| Space group             | P 21/ c                                                                                        |
| Unit cell dimensions    | a = 15.5100(12) Å   α = 90°.<br>b = 11.3371(15) Å   β = 91.122°.<br>c = 21.885(2) Å   γ = 90°. |
| Volume                  | 3847.5(7) Å <sup>3</sup>                                                                       |
| Z                       | 4                                                                                              |
| Density (calculated)    | 1.296 Mg/m <sup>3</sup>                                                                        |
| Absorption coefficient  | 0.081mm <sup>-1</sup>                                                                          |
| F(000)                  | 1576.0                                                                                         |
| Crystal size            | 0.28 x 0.16 x 0.09 mm <sup>3</sup>                                                             |
| θ <sub>max</sub> (°)    | 29.541                                                                                         |
| Index ranges            | -19 ≤ h ≤ 21, -10 ≤ k ≤ 15, -29 ≤ l ≤ 30                                                       |
| Reflections collected   | 9359                                                                                           |
| Independent reflections | 3191                                                                                           |
| Absorption correction   | Multi- scan                                                                                    |

|                                |                                             |
|--------------------------------|---------------------------------------------|
|                                |                                             |
| Max. and min. transmission     | 1.000 to 0.432                              |
| Refinement method              | Full-matrix least-squares on F <sup>2</sup> |
| Goodness-of-fit on F2          | 1.064                                       |
| Data / restraints / parameters | 1359/ 0 / 523                               |
| R indices (all data)           | R1 = 0.1093, wR2 = 0.4105                   |
| Extinction coefficient         | n/a                                         |
| Largest diff. peak and hole    | 0.265 and -0.259 e. Å <sup>-3</sup>         |

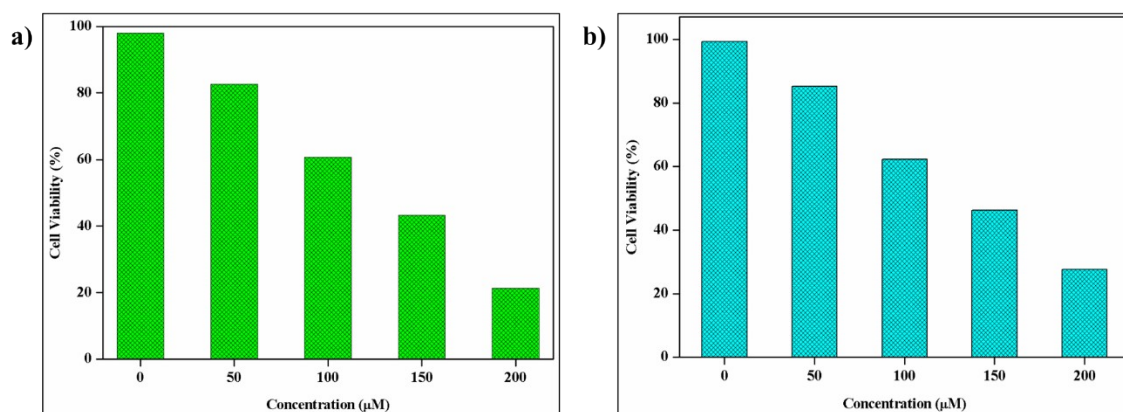

**Figure S20.** Cytotoxicity of probes **ONA** and **MNA** alone

**Table S3.** IC<sub>50</sub> values calculated from MCF-7 cell line

| Probes | IC <sub>50</sub> (μM) |
|--------|-----------------------|
|        | MCF-7 cell line       |
| ONA    | 129.04±29.04          |
| MNA    | 138.75±38.75          |
